# Supplementary material
Source: publisher figshare collection journal article supplement (https://sage.figshare.com/ndownloader/files/14452790)
Supplement: Supplementary file 1 [file 14452790]

## **Supplementary Content**

**Impact of low-dose hydrocortisone on the incidence of atrial fibrillation in septic shock patients. A propensity score-inverse probability of treatment weighting cohort study**

Y LAUNEY, S LASOCKI, K ASEHNOUNE, B GAUDRIOT, C CHASSIER, R CINOTTI, P LE  
MAGUET, MD; L LAKSIRI, A TAWA, Y MALLEDANT, B PERROT, P SEGUIN

**Supplementary Digital Content 1**

Density of propensity scores for no-hydrocortisone (untreated) and hydrocortisone (treated) groups.

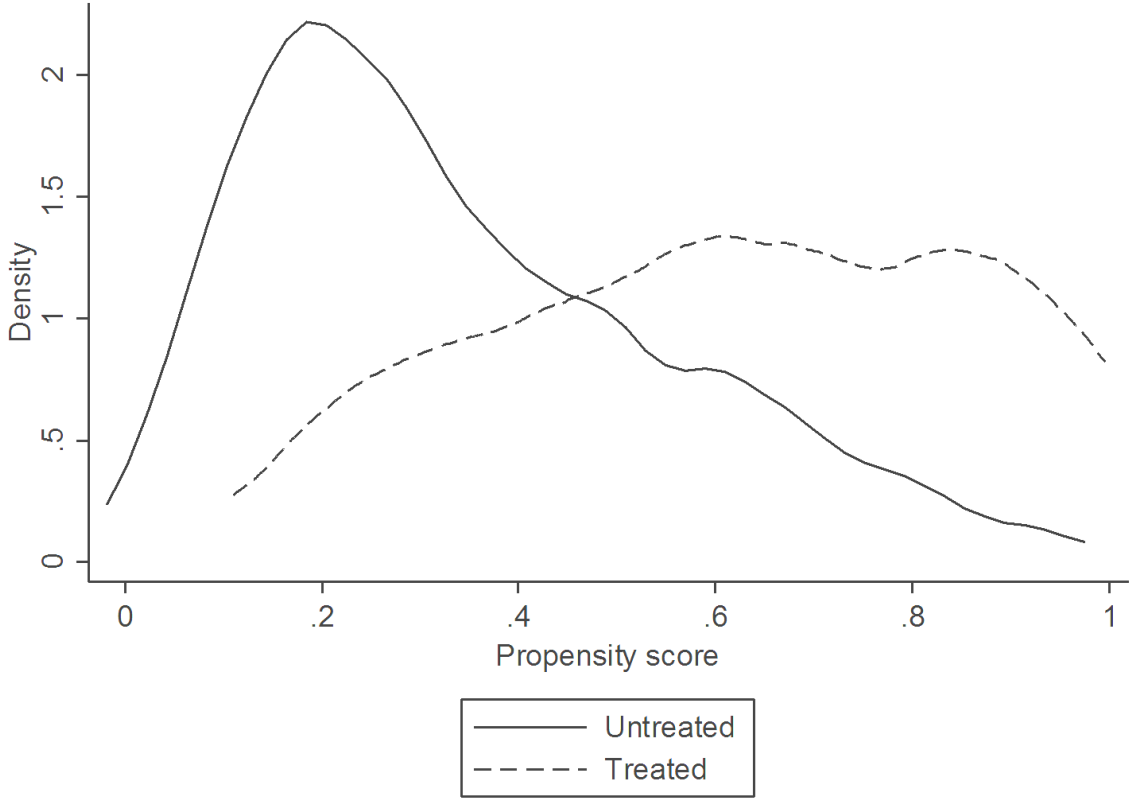

Note: A reasonable overlap is needed to ensure that patients with the same covariates values have a positive probability of being in each treatment group.

## Supplementary Digital Content 2

Standardized differences of covariates included in the propensity score model.

|                                                                                                          | Standardized difference in the unweighted sample | Standardized difference in the weighted sample |
|----------------------------------------------------------------------------------------------------------|--------------------------------------------------|------------------------------------------------|
| Age                                                                                                      | 0.131                                            | -0.008                                         |
| Central venous catheter during septic shock                                                              | 0.146                                            | -0.049                                         |
| SAPS II at admission                                                                                     | 0.314                                            | -0.021                                         |
| SOFA score at admission                                                                                  | 0.533                                            | 0.109                                          |
| White blood cells, G/L                                                                                   | -0.001                                           | 0.006                                          |
| Maximum dose of norepinephrine during septic shock, $\mu\text{g}\cdot\text{kg}^{-1}\cdot\text{min}^{-1}$ |                                                  |                                                |
| 0-0.30                                                                                                   | reference                                        | reference                                      |
| 0.30-1.00                                                                                                | 0.010                                            | 0.068                                          |
| >1.00                                                                                                    | 0.694                                            | -0.006                                         |
| Maximum dose of epinephrine during septic shock, $\mu\text{g}\cdot\text{kg}^{-1}\cdot\text{min}^{-1}$    | 0.030                                            | 0.018                                          |
| Chronic renal failure                                                                                    | -0.096                                           | -0.014                                         |
| Thyroid disorder                                                                                         | 0.096                                            | 0.034                                          |
| Corticotherapy                                                                                           | 0.378                                            | 0.117                                          |
| Dobutamine                                                                                               | 0.567                                            | -0.004                                         |
| Epinephrine                                                                                              | 0.181                                            | 0.011                                          |
| Pulmonary artery catheter during septic shock                                                            | -0.016                                           | -0.073                                         |
| Cardiac surgery                                                                                          | -0.087                                           | -0.047                                         |
| Mediastinal drainage during septic shock                                                                 | -0.093                                           | -0.027                                         |

|                              |       |        |
|------------------------------|-------|--------|
| Dialysis during septic shock | 0.402 | -0.073 |
|------------------------------|-------|--------|

### Supplementary Digital Content 3

AF duration and treatment in the treated and untreated groups.

|                                           | Hydrocortisone -<br>(n=138) | Hydrocortisone +<br>(n=123) | p     |
|-------------------------------------------|-----------------------------|-----------------------------|-------|
| AF duration, hours, median (range)        | 4 (0.15-408)                | 6 (0.5-413)                 | 0.664 |
| Treatment for AF, yes, n(%)               | 25 (76%)                    | 22 (92%)                    | 0.112 |
| Number of treatments applied*,<br>mean±SD | 1.52±1.20                   | 1.58±0.72                   | 0.650 |

\*Treatments consisted of amiodarone and/or digoxin and/or magnesium sulfate and/or beta-blockers and/or electrical cardioversion.

### Supplementary Digital Content 4

Hydrocortisone doses received by patients (as a bolus and from day 1 to day 9). Data are shown as the mean  $\pm$  SD.

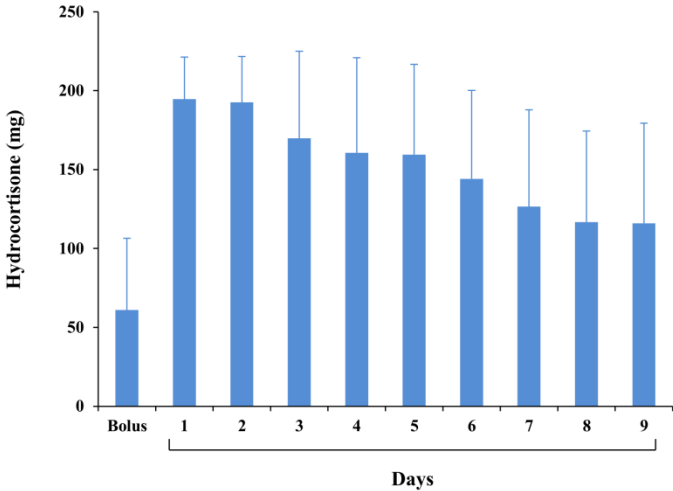

Data are mean (SD)

## Supplementary Digital Content 5

Microbiological data in patients who did or did not receive hydrocortisone.

|               |                            | Hydrocortisone – | Hydrocortisone + |
|---------------|----------------------------|------------------|------------------|
| Aerobic       |                            |                  |                  |
| Gram-negative |                            |                  |                  |
|               | <i>Escherichia coli</i>    | 51               | 42               |
|               | <i>Klebsiella</i> spp.     | 20               | 8                |
|               | <i>Pseudomonas</i> spp.    | 14               | 10               |
|               | <i>Enterobacter</i> spp.   | 11               | 13               |
|               | <i>Proteus</i> spp.        | 4                | 5                |
|               | Other bacteria             | 9                | 22               |
|               |                            |                  |                  |
| Gram-positive |                            |                  |                  |
|               | <i>Streptococcus</i> spp.  | 19               | 22               |
|               | <i>Enterococcus</i> spp.   | 27               | 34               |
|               | <i>Staphylococcus</i> spp. | 21               | 24               |
|               |                            |                  |                  |
| Anaerobic     |                            |                  |                  |
|               | <i>Bacteroides</i> spp.    | 14               | 7                |
|               | <i>Clostridium</i> spp.    | 5                | 5                |
|               | Other bacteria             | 5                | 1                |
| Yeasts        |                            |                  |                  |
|               | <i>Candida</i> spp.        | 16               | 19               |
|               | <i>Aspergillus</i> spp.    | 0                | 2                |

Data are expressed as number of microorganisms recovered.
